# Supplementary material
Source: HighWire-hosted journal article supplement (https://drc.bmj.com/content/11/2/e003262)
Supplement: inline-supplementary-material-1 [file inline-supplementary-material-1.pdf]

**Supplementary Table 1.** Comparison of the results (HRs) from survival analysis based on case-cohort and full cohort data

|                          | Time-fixed scores |                   | Time-varying scores |                   |
|--------------------------|-------------------|-------------------|---------------------|-------------------|
|                          | All_3 Case-Cohort | All_3 Full-Cohort | All_3 Case-Cohort   | All_3 Full-Cohort |
| Sex                      | 1.43 (1.41–1.45)  | 1.42 (1.41–1.43)  | 1.37 (1.35–1.39)    | 1.35 (1.34–1.36)  |
| Age                      | 1.07 (1.06–1.07)  | 1.07 (1.07–1.07)  | 1.05 (1.05–1.05)    | 1.05 (1.05–1.05)  |
| aDCSI                    | 1.14 (1.14–1.15)  | 1.14 (1.14–1.14)  | 1.12 (1.11–1.12)    | 1.12 (1.12–1.12)  |
| CCI                      | 1.10 (1.09–1.10)  | 1.10 (1.10–1.10)  | 1.27 (1.27–1.28)    | 1.28 (1.27–1.28)  |
| C-index                  | 0.765             | 0.765             | 0.825               | 0.825             |
| AIC                      | 7,984,549         | 9,101,513         | 7,793,865           | 8,910,367         |
| Computing time (seconds) | 75                | 180               | 208                 | 1026              |

‘All\_3’ denotes a model with all-cause mortality as endpoint using variable set 3 (sex, age and both aDCSI and CCI).

AIC is different for case-cohort and full cohort analysis because the number of subjects is different. The rank of AIC remained the same.

Abbreviations: aDCSI, adapted Diabetes Complications Severity Index; AIC, Akaike information criterion; CCI, Charlson Comorbidity Index; C-index, Harrell’s concordance index; CVD, cardiovascular disease; HR, hazard ratio.

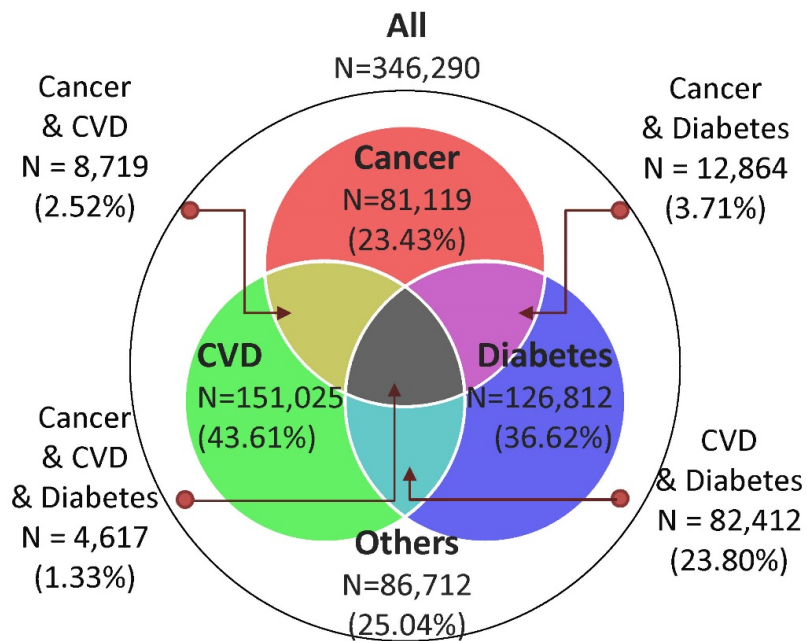

**Supplementary figure 1.** The Venn diagram for causes of death.

Abbreviations: CVD, cardiovascular disease.

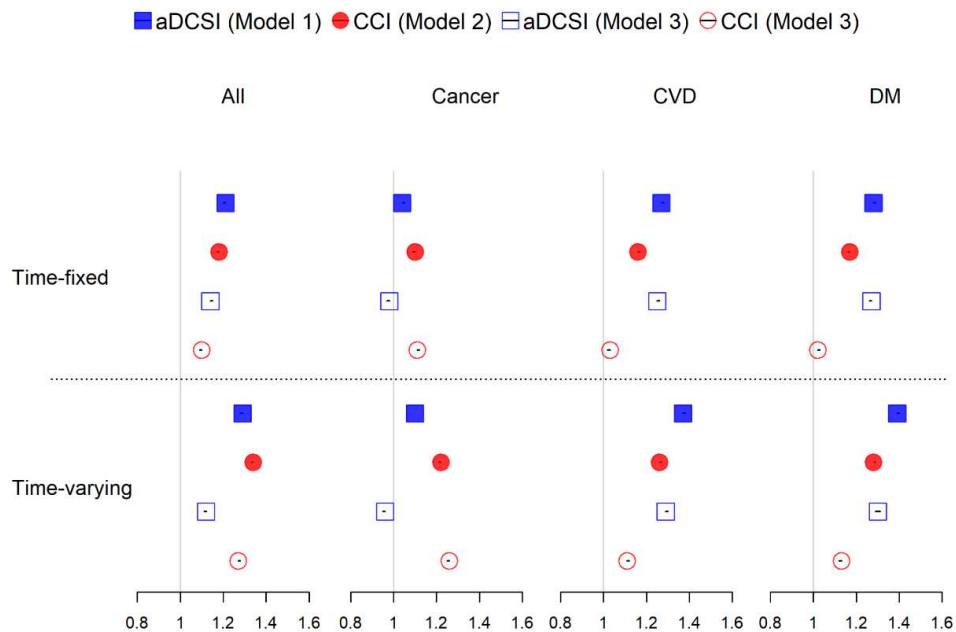

**Supplementary figure 2.** The forest plot of HRs and 95% confidence intervals of aDCSI and CCI for all-cause and cause-specific mortality. There are 4 endpoints (all-cause, cancer, CVD and diabetes mortality) and 3 variable sets (model 1: sex, age and aDCSI; model 2: sex, age and CCI; and model 3: sex, age and both aDCSI and CCI). The plot is corresponding to the HRs in Table 2.

Abbreviations: aDCSI, adapted Diabetes Complications Severity Index; CCI, Charlson Comorbidity Index; CVD, cardiovascular disease; DM, diabetes mellitus; HR, hazard ratio.

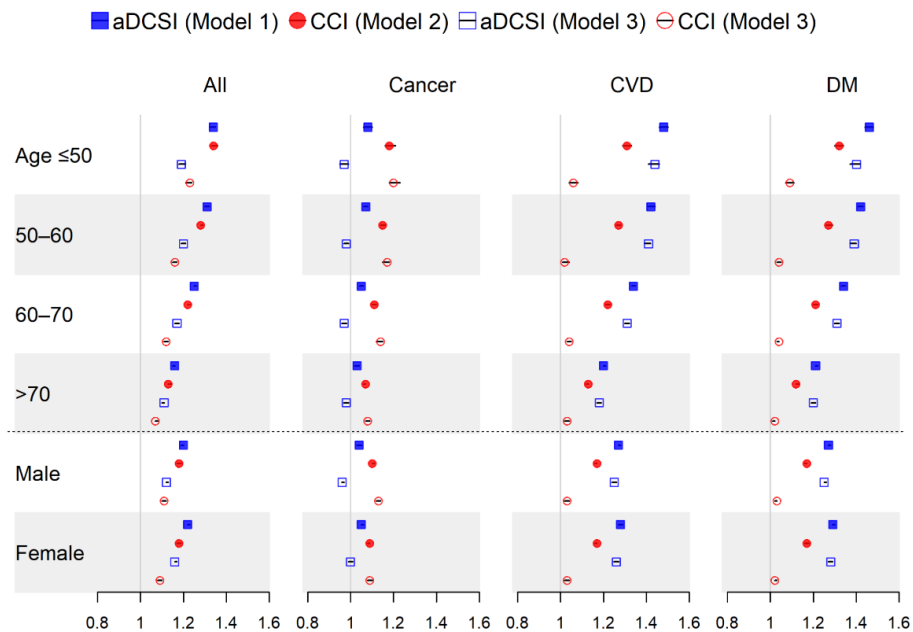

**Supplementary figure 3.** The forest plot of HRs and 95% confidence intervals of aDCSI and CCI in subgroup by age and sex. There are 4 endpoints (all-cause, cancer, CVD and diabetes mortality) and 3 variable sets (model 1: sex, age and aDCSI; model 2: sex, age and CCI; and model 3: sex, age and both aDCSI and CCI)

Abbreviations: aDCSI, adapted Diabetes Complications Severity Index; CCI, Charlson Comorbidity Index; CVD, cardiovascular disease; DM, diabetes mellitus; HR, hazard ratio.

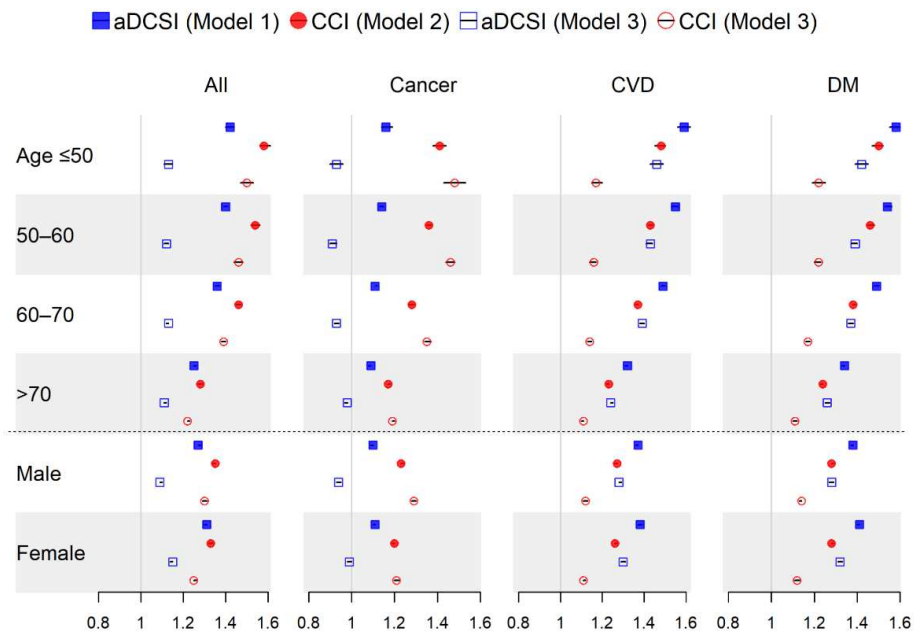

**Supplementary figure 4.** The forest plot of HRs and 95% confidence intervals of time-varying aDCSI and CCI in subgroup by age and sex. There are 4 endpoints (all-cause, cancer, CVD and diabetes mortality) and 3 variable sets (model 1: sex, age and aDCSI; model 2: sex, age and CCI; and model 3: sex, age and both aDCSI and CCI)  
Abbreviations: aDCSI, adapted Diabetes Complications Severity Index; CCI, Charlson Comorbidity Index; CVD, cardiovascular disease; DM, diabetes mellitus; HR, hazard ratio.
